# Supplementary material
Source: MDPI journal article supplement (https://www.mdpi.com/1424-8247/14/5/457)
Supplement: s1 [file s1]

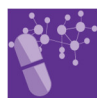

## Supplementary Materials

**Supplementary Figure S1.** Methylation analysis of *CDH1* promoter and enhancers from peripheral blood of 6 healthy individuals. ○ non-methylated CpG site; ● partially methylated CpG site; ● fully methylated CpG site.

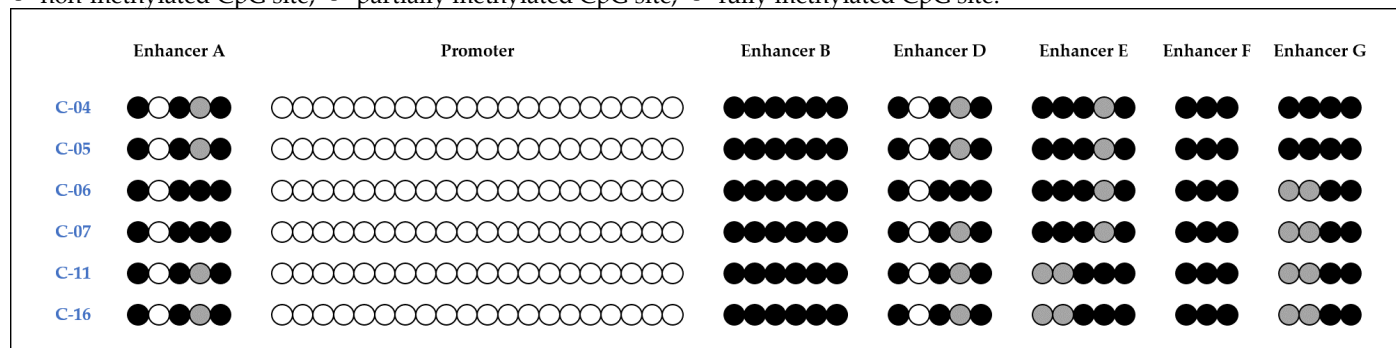

**Supplementary Figure S2.** Methylation analysis of *CDH1* promoter and enhancers from peripheral blood of 20 HDGC *CDH1*-negative patients (15 DGC patients in black and 5 LBC patients in violet). DGC: diffuse gastric cancer; LBC: lobular breast cancer; ○ non-methylated CpG site; ● partially methylated CpG site; ● fully methylated CpG site.

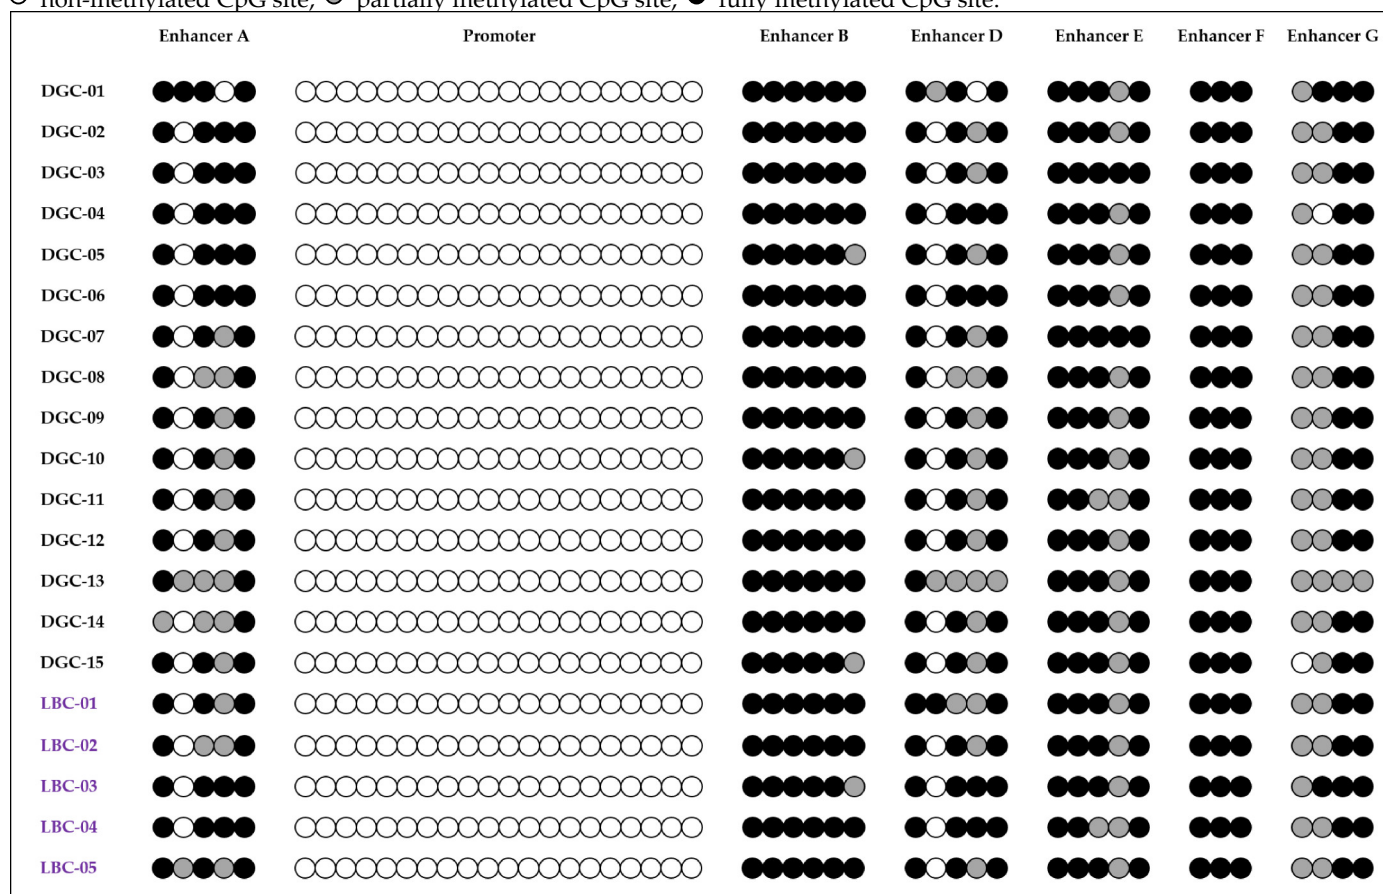

**Supplementary Figure S3.** Methylation analysis of *CDH1* promoter and enhancers A and B on DNA samples from gastric normal (N) and tumor (T) tissues from 5 patients with sporadic GC. IGC: intestinal gastric cancer; DGC: diffuse gastric cancer; Muc: mucinous gastric cancer; Mix: Mixed gastric cancer. ○ non-methylated CpG site; ● partially methylated CpG site; ● fully methylated CpG site; NA: not available.

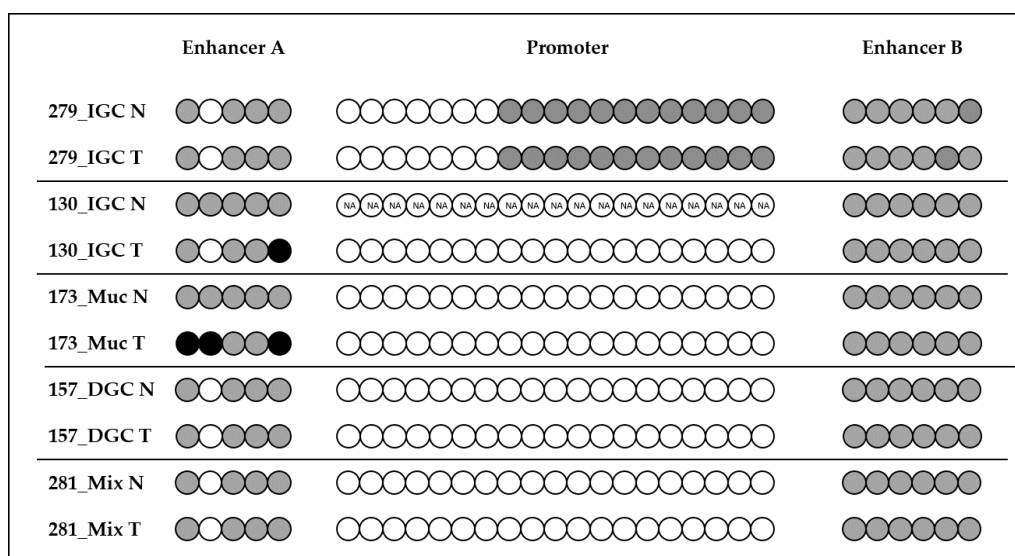Supplementary Table S1. Results of the *CDH1* variant analysis on 7 GC cell lines.

| GC cell line | <i>CDH1</i> status | cDNA           | protein   | VAF <sup>1</sup> |
|--------------|--------------------|----------------|-----------|------------------|
| NCI-N87      | wild-type          | -              | -         | -                |
| KATO-III     | pathogenic variant | c.1008G>A      | p.Glu336= | 0.71             |
| SNU-5        | pathogenic variant | c.687+1G>C     | p.?       | 1.00             |
| SNU-1        | wild-type          | -              | -         | -                |
| AKG          | wild-type          | -              | -         | -                |
| GK2          | wild-type          | -              | -         | -                |
| KKP          | pathogenic variant | c.1-?_163+?del | p.?       | 1.00             |

<sup>1</sup> VAF: variant allele frequency.Supplementary Table S2. Genomic coordinates of *CDH1* regulatory elements identified by FANTOM5.

| <i>CDH1</i> element | Genomic coordinates (hg38) | Size (bp) |
|---------------------|----------------------------|-----------|
| Promoter            | chr16: 68737132 - 68738441 | 1310      |
| Enhancer A          | chr16: 68732016 - 68732406 | 391       |
| Enhancer B          | chr16: 68744856 - 68745117 | 262       |
| Enhancer C          | chr16: 68745532 - 68745656 | 125       |
| Enhancer D          | chr16: 68760873 - 68761125 | 253       |
| Enhancer E          | chr16: 68770585 - 68770965 | 381       |
| Enhancer F          | chr16: 68784312 - 68784444 | 133       |
| Enhancer G          | chr16: 68791011 - 68791314 | 304       |

Supplementary Table S3. Results of *CDH1* expression on 7 different GC cell lines.

| GC cell line | $\Delta C_t$ | $2^{-\Delta C_t}$      |
|--------------|--------------|------------------------|
| NCI-N87      | 1.810        | 0.285                  |
| KATO-III     | 3.081        | 0.118                  |
| SNU-5        | 10.879       | 0.001                  |
| SNU-1        | 13.622       | $7.933 \times 10^{-5}$ |
| AKG          | 1.050        | 0.483                  |
| GK2          | 13.648       | $7.789 \times 10^{-5}$ |
| KKP          | 13.446       | $8.961 \times 10^{-5}$ |

Supplementary Table S4. Characteristics of the 8 GC cell lines used in the study.

| Cell line | Age | Sex | Ancestry | Origin                    | Tissue type                                                                                 | Reference |
|-----------|-----|-----|----------|---------------------------|---------------------------------------------------------------------------------------------|-----------|
| SNU-1     | 44  | M   | Asian    | Primary gastric carcinoma | Poorly differentiated carcinoma                                                             | [1]       |
| SNU-5     | 33  | F   | Asian    | Ascitic effusion          | Poorly differentiated carcinoma                                                             | [1]       |
| KATO-III  | 55  | M   | Asian    | Pleural effusion          | Gastric carcinoma of the diffuse histotype <sup>a</sup> with signet-ring cells <sup>b</sup> | [2]       |
| NCI-N87   | -   | M   | -        | Liver metastasis          | Well-differentiated gastric carcinoma of the intestinal histotype <sup>a</sup>              | [1]       |
| GK2       | 60  | M   | European | Abdominal effusion        | Poorly differentiated gastric adenocarcinoma of the intestinal histotype <sup>a</sup>       | [3]       |
| AKG       | 64  | M   | European | Pleural effusion          | Infiltrating gastric cancer of the intestinal histotype <sup>a</sup>                        | [3]       |
| KKP       | 63  | M   | European | Ascitic effusion          | Poorly differentiated gastric carcinoma of the intestinal histotype <sup>a</sup>            | [4]       |
| MKN-74    | 37  | M   | Asian    | Liver metastasis          | Gastric tubular adenocarcinoma <sup>b</sup>                                                 | [5]       |

<sup>a</sup> Lauren classification [6]

<sup>b</sup> WHO classification [7]

**Supplementary Table S5.** Clinical characteristics of the 20 HDGC *CDH1*-negative patients whose peripheral blood was analyzed.

| Patient ID | Sex | Diagnosis <sup>1</sup> | Age at diagnosis | Selection criteria <sup>2</sup> | <i>CDH1</i> status |
|------------|-----|------------------------|------------------|---------------------------------|--------------------|
| DGC-01     | F   | DGC                    | 36               | I + II                          | WT                 |
| DGC-02     | F   | DGC                    | 34               | I + II                          | WT                 |
| DGC-03     | F   | DGC                    | 32               | II                              | WT                 |
| DGC-04     | F   | DGC                    | 30               | II                              | WT                 |
| DGC-05     | M   | DGC                    | 33               | I + II                          | WT                 |
| DGC-06     | F   | DGC                    | 24               | II                              | WT                 |
| DGC-07     | M   | DGC                    | 32               | II                              | WT                 |
| DGC-08     | F   | DGC                    | 36               | II                              | WT                 |
| DGC-09     | F   | DGC                    | 36               | II                              | WT                 |
| DGC-10     | F   | DGC                    | 22               | II                              | WT                 |
| DGC-11     | M   | DGC                    | 39               | II                              | WT                 |
| DGC-12     | F   | DGC                    | 27               | II                              | WT                 |
| DGC-13     | M   | DGC                    | 33               | I + II                          | WT                 |
| DGC-14     | F   | DGC                    | 29               | II                              | WT                 |
| DGC-15     | F   | DGC                    | 39               | II                              | WT                 |
| LBC-01     | F   | LBC                    | 35               | IV                              | WT                 |
| LBC-02     | F   | LBC                    | 45               | III                             | WT                 |

|        |   |     |    |          |    |
|--------|---|-----|----|----------|----|
| LBC-03 | F | LBC | 47 | III      | WT |
| LBC-04 | F | LBC | 46 | IV       | WT |
| LBC-05 | F | LBC | 48 | III + IV | WT |

<sup>1</sup> Lauren classification [6]

<sup>2</sup> Selection criteria are according to the 2015 HDGC guidelines [8]

**Supplementary Table S6.** Clinical characteristics of the 13 patients from whose gastric normal and tumor tissues were analyzed.

| Patient ID | Sex | Diagnosis <sup>1,2</sup> | Age at diagnosis |
|------------|-----|--------------------------|------------------|
| 06/07      | F   | IGC                      | 86               |
| 08/07      | M   | IGC                      | 56               |
| 09/07      | M   | IGC                      | 72               |
| 12/08      | M   | IGC                      | 75               |
| 05/09      | F   | IGC                      | 71               |
| 17/11      | F   | IGC                      | 63               |
| 18/11      | F   | IGC                      | 88               |
| 10/12      | M   | IGC                      | 84               |
| 279_IGC    | F   | IGC                      | 74               |
| 130_IGC    | M   | IGC                      | 70               |
| 173_Muc    | M   | Mucinous                 | 70               |
| 157_DGC    | M   | DGC                      | 73               |
| 281_Mix    | F   | Mixed                    | 84               |

<sup>1</sup> Lauren classification [6]

<sup>2</sup> WHO classification [7]

**Supplementary Table S7.** Sequences of the primers used for amplification and sequencing in the methylation analysis of *CDH1* regulatory regions on bisulfite-converted DNA.

| CDH1 element | Primer F (5'→3')       | Primer R (5'→3')        | Product size (bp) |
|--------------|------------------------|-------------------------|-------------------|
| Promoter     | GGTAGGTGAATTTTGTAGTTAA | ACTCCAAAAACCCATAACTAACC | 221               |
| Enhancer A   | GGGTGATGAATATTTGTGG    | CACTTCCTAAATATTTTAACC   | 485               |
| Enhancer B   | GGAGGATTTGGTGTGTTTG    | CTAACAAATTCAAAATCATCCC  | 352               |
| Enhancer D   | GTTTTTTTAGAGTGGGGAG    | CTACAATCCTACCAAATCTC    | 330               |
| Enhancer E   | GGTAGTATATTTTAGAAGGATG | CTATCTCCTACACATCATTTTC  | 504               |
| Enhancer F   | GGAGTTTATATTTTGTGTTGG  | CCATACAAAATACAAAAAACC   | 272               |
| Enhancer G   | GTTGTTAAGAAGGGTATGG    | CCAAAACTTTATATAACAAAC   | 400               |

## References

1. Park, J.G.; Frucht, H.; LaRocca, R. V; Bliss, D.P.; Kurita, Y.; Chen, T.R.; Henslee, J.G.; Trepel, J.B.; Jensen, R.T.; Johnson, B.E. Characteristics of cell lines established from human gastric carcinoma. *Cancer Res.* **1990**, *50*, 2773–80.
2. Sekiguchi, M.; Sakakibara, K.; Fujii, G. Establishment of cultured cell lines derived from a human gastric carcinoma. *Jpn. J. Exp. Med.* **1978**, *48*, 61–8.
3. Bertoni, L.; Zoli, W.; Mucciolo, E.; Ricotti, L.; Nergadze, S.; Amadori, D.; Giulotto, E. Different genome organization in two new cell lines established from human gastric carcinoma. *Cancer Genet. Cytogenet.* **1998**, *105*, 152–9.
4. Zoli, W.; Ricotti, L.; Lenzi, L.; Roncuzzi, L.; Zini, N.; Amadori, D.; Gruppioni, R.; Sensi, A.; Gasperi-Campani, A. Molecular genetics and in vitro sensitivity of a new human cell line, KKP, from a gastric adenocarcinoma. *Cancer Genet. Cytogenet.* **1998**, *105*, 43–9.

5. Hojo, H. Establishment of cultured cell lines of human stomach cancer origin and their morphological characteristics. *Niigata Igakkai Zasshi* **1977**, *91*, 737–763.
6. Lauren, P. The two histological main types of gastric carcinoma: diffuse and so-called intestinal-type carcinoma. An attempt at a histo-clinical classification. *Acta Pathol. Microbiol. Scand.* **1965**, *64*, 31–49.
7. International Agency for Research on Cancer *WHO classification of tumours of the digestive system*; Fred T. Bosman, Fátima Carneiro, Ralph H. Hruban, N.D.T., Ed.; 4th ed.; IARC, 2010; ISBN 9789283224327.
8. van der Post, R.S.; Vogelaar, I.P.; Carneiro, F.; Guilford, P.; Huntsman, D.; Hoogerbrugge, N.; Caldas, C.; Schreiber, K.E.C.; Hardwick, R.H.; Ausems, M.G.E.M.; et al. Hereditary diffuse gastric cancer: updated clinical guidelines with an emphasis on germline CDH1 mutation carriers. *J. Med. Genet.* **2015**, *52*, 361–74.
